# Supplementary material for: Genetic diversity in natural populations of noble crayfish (Astacus astacus L.) in north-western Poland on the basis of combined SSR and AFLP data
Source: PeerJ. 2019 Jul 29;7:e7301. doi: 10.7717/peerj.7301 (PMC6673429; doi:10.7717/peerj.7301)
Supplement: Dataset S1 — Raw data for microsatellites (SSR) obtained for 5 populations of noble crayfish. BI –Biwakowe Lake, KW –Kwisno Lake, GR –Graniczne Lake, SE –Sęki Lake, BA –Babinki Lake [file peerj-07-7301-s001.xlsx]

## Sheet: SSR
	Aas1198		Aas6		Aas3040		Aas766		Aas7		Aas3666		Aas11		Aas2		Aas8
	163-205		154-188		251-275		229-311		254-276		233-253		185-197		147-177		185-205
1 Gr	183	185	150	150	241	241	291	293	256	258	233	233	177	177	157	157	183	183
2 Gr	183	185	144	150	241	243	291	293	256	258	233	233	177	177	157	157	183	183
3 Gr	183	185	150	152	241	243	289	291	256	258	233	233	177	177	157	157	183	183
4 Gr	183	185	150	150	241	243	291	293	258	260	233	233	177	177	157	157	183	183
5 Gr	183	185	144	150	241	243	291	293	256	258	233	233	177	177	155	157	183	183
6 Gr	183	185	150	150	243	243	289	291	278	280	253	255	177	177	175	177	203	203
7 Gr	183	185	150	150	243	243	289	291	258	260	227	233	177	177	157	157	183	183
8 Gr	183	185	150	150	243	243	289	291	276	278	245	251	197	197	177	177	203	207
9 Gr	183	185	150	150	241	243	287	289	258	260	231	233	177	177	157	157	183	183
10 Gr	183	185	144	150	241	243	289	293	256	258	233	233	177	177	157	157	183	183
11 Gr	183	185	144	150	243	245	291	293	256	258	231	233	177	177	157	157	183	183
13 Gr	183	185	150	150	243	243	291	293	280	282	251	253	197	197	177	177	203	203
14 Gr	183	185	150	150	243	243	291	293	256	258	233	235	177	177	157	157	183	183
15 Gr	183	185	148	180	243	243	289	293	256	258	231	233	177	177	157	157	183	183
21 Gr	183	185	150	150	243	243	291	293	256	258	233	233	177	179	157	157	183	183
23 Gr	183	185	144	150	243	243	289	293	258	260	233	233	177	177	157	157	183	183
24 Gr	183	185	150	150	243	245	287	289	256	258	233	233	177	177	157	157	183	183
27 Gr	183	185	150	150	243	243	289	295	258	260	233	233	177	177	157	157	183	183
30 Gr	183	185	150	150	241	243	289	293	258	260	233	233	177	177	157	157	183	183
32 Gr	183	185	144	150	241	243	289	291	256	258	233	233	177	179	157	157	183	183
1 Ba	183	185	150	150	241	243	289	291	256	258	233	235	177	177	157	157	183	183
2 Ba	173	175	150	150	241	245	289	291	256	258	233	233	177	177	157	157	183	183
3 Ba	183	185	150	150	243	243	289	291	256	258	233	235	177	177	157	157	183	183
4 Ba	183	185	150	150	243	245	289	291	256	258	233	235	177	177	157	157	183	183
5 Ba	189	191	150	150	243	243	291	293	278	280	255	255	197	197	177	177	203	203
6 Ba	183	185	150	150	241	243	291	293	258	260	235	235	177	177	157	157	183	185
7 Ba	185	193	150	150	241	243	289	293	256	258	235	235	177	177	157	161	183	183
8 Ba	181	183	150	150	243	243	289	291	256	258	235	235	177	177	157	159	183	185
9 Ba	181	183	150	150	243	243	289	291	256	258	227	235	177	177	157	157	185	185
10 Ba	181	183	150	150	241	245	289	291	258	260	235	235	177	177	157	157	185	185
12 Ba	187	193	150	150	241	243	285	291	258	260	235	235	177	177	157	157	183	183
13 Ba	181	183	150	150	241	243	291	295	256	258	235	235	177	177	157	157	183	185
15 Ba	189	191	150	150	241	245	291	293	256	258	233	235	177	177	157	157	183	185
16 Ba	183	185	150	150	241	243	285	297	256	258	233	235	177	177	157	157	183	183
17 Ba	181	183	150	150	241	243	285	289	256	258	235	237	177	177	157	157	183	183
19 Ba	181	183	150	150	243	245	289	291	256	258	235	235	177	177	157	157	183	185
20 Ba	181	183	150	150	243	243	289	291	256	258	233	235	177	177	157	157	183	183
21 Ba	181	183	150	150	243	243	289	291	258	260	235	235	177	177	157	161	183	185
22 Ba	187	193	150	150	243	245	289	291	256	258	235	235	177	177	157	157	183	185
23 Ba	173	175	150	150	243	243	289	291	256	258	235	235	177	179	157	157	183	183
1 Bi	173	185	150	150	243	243	291	293	258	260	233	233	179	179	157	157	183	183
2 Bi	183	185	150	150	243	243	289	291	258	260	233	233	179	179	157	157	183	183
3 Bi	181	183	150	150	239	243	289	291	260	262	233	233	177	177	157	157	183	183
5 Bi	181	183	150	150	243	243	289	291	258	262	227	233	177	179	157	157	183	183
7 Bi	181	183	150	150	243	243	289	291	258	260	233	233	177	177	157	157	183	183
9 Bi	181	183	150	150	243	243	289	291	258	260	233	233	177	179	157	157	183	183
13 Bi	181	183	150	150	243	243	289	291	260	262	233	233	179	187	157	157	183	183
14 Bi	181	183	150	150	239	243	289	291	260	262	233	233	179	187	157	157	183	183
15 Bi	183	185	150	150	243	243	289	291	258	260	233	233	179	187	157	157	183	183
17 Bi	183	185	150	150	243	243	289	291	260	262	233	233	179	179	157	157	183	183
4 Bi	181	183	150	150	243	243	289	291	258	260	233	233	179	179	157	157	183	183
11 Bi	181	183	150	150	243	243	289	291	260	262	233	233	177	187	157	157	183	183
12 Bi	181	183	150	150	243	243	289	291	260	262	233	233	177	179	157	157	183	183
16 Bi	181	183	150	150	239	243	289	291	260	262	233	233	179	179	157	157	183	183
18 Bi	181	183	150	150	243	243	289	291	262	264	233	233	177	179	157	157	183	183
19 Bi	183	183	150	150	243	243	289	291	260	262	233	233	179	179	157	157	183	183
22 Bi	183	185	150	150	239	241	289	291	258	260	233	233	177	179	157	157	183	183
23 Bi	183	185	150	150	243	243	289	291	260	262	233	233	179	179	157	157	183	183
24 Bi	181	183	150	150	243	243	289	291	260	262	233	233	177	179	157	157	183	183
31 Bi	181	183	150	150	239	243	289	291	260	262	233	233	179	187	157	157	183	183
3 Se	181	183	150	150	241	243	289	291	258	260	235	235	177	177	157	157	183	185
4 Se	181	183	150	150	243	243	289	291	258	260	235	235	177	177	157	157	183	183
10 Se	181	183	150	150	243	243	289	291	258	260	235	235	177	177	157	157	183	183
9 Se	181	183	150	150	243	243	289	291	258	260	235	235	177	177	157	157	183	183
12 Se	183	185	150	150	241	241	289	291	258	262	235	235	177	177	157	157	183	185
15 Se	181	183	150	152	241	241	289	291	258	260	235	235	177	177	157	157	183	185
16 Se	189	191	150	150	243	243	289	291	258	260	235	235	177	177	157	157	183	183
17 Se	181	183	150	150	243	243	289	291	258	260	231	235	177	177	157	157	183	183
18 Se	181	183	150	150	243	243	289	291	258	260	235	235	177	177	157	157	183	185
19 Se	181	183	150	150	243	243	289	291	258	260	235	237	177	177	157	157	183	185
7 Se	185	191	150	150	243	243	289	291	258	260	235	235	177	177	157	157	183	183
8 Se	181	183	150	150	243	243	289	291	258	260	235	235	177	177	157	157	183	183
20 Se	181	183	150	150	243	243	289	291	258	260	235	235	177	177	157	157	183	185
21 Se	181	183	150	150	243	243	289	291	256	258	233	235	177	177	157	157	183	183
23 Se	181	183	150	150	243	243	289	291	258	260	235	235	177	177	157	157	185	185
24 Se	181	183	150	150	243	243	289	291	256	258	235	235	177	177	157	157	183	183
25 Se	181	183	150	150	243	243	289	291	258	260	235	235	177	177	157	157	183	183
26 Se	181	193	144	150	243	243	289	291	258	260	233	235	177	177	157	157	183	183
26 B Se	181	183	150	150	243	243	289	291	256	258	235	235	177	177	157	157	183	185
27 Se	181	183	150	152	243	243	289	291	258	260	235	235	177	177	157	157	183	185
3 Kw	183	185	144	150	241	243	289	291	258	260	235	235	177	177	157	157	183	185
6 Kw	183	185	144	150	243	243	289	291	258	260	233	233	177	177	157	157	183	183
7 Kw	181	183	150	150	241	243	289	291	256	258	233	233	177	177	157	157	183	183
9 Kw	181	183	150	150	241	241	285	287	256	258	233	233	177	177	157	157	183	183
10 Kw	181	183	150	150	241	243	289	291	256	258	233	233	177	177	157	157	183	187
12 Kw	181	183	144	150	243	243	289	291	256	258	233	233	177	177	157	157	183	183
13 Kw	181	183	150	150	243	243	289	291	256	258	233	233	177	177	157	157	183	187
14 Kw	181	183	150	150	243	243	289	291	256	258	229	231	177	177	157	157	183	183
17 Kw	183	185	144	150	243	243	289	291	258	260	231	233	177	177	157	157	183	183
22 Kw	183	185	144	144	241	241	289	291	256	258	233	233	177	177	157	157	183	187
16 Kw	181	183	144	150	243	243	289	291	256	258	231	233	177	177	157	157	183	183
20 Kw	181	183	144	150	243	243	289	291	256	258	227	233	177	177	157	157	183	183
23 Kw	183	185	150	150	241	243	289	291	256	258	233	233	177	177	157	157	183	183
24 Kw	181	183	144	150	243	243	285	287	258	260	231	233	177	177	157	157	183	183
28 Kw	181	183	150	150	243	243	287	291	256	258	231	233	177	177	157	157	183	183
30 kw	183	185	144	144	241	241	289	291	256	258	231	233	177	179	157	157	183	183
31 Kw	183	185	144	150	243	243	289	291	256	258	231	233	177	177	157	157	183	183
N1 Kw	183	185	150	150	243	243	289	291	256	258	233	233	177	177	157	157	183	183
N2 Kw	183	185	144	150	243	243	289	291	258	260	233	233	177	177	157	157	183	183
N3 Kw	183	185	144	150	243	243	289	291	256	258	229	233	177	177	157	157	183	183
